# Supplementary material for: A novel and environmentally friendly bioprocess for separation and partial purification of polysaccharides from Cordyceps sinensis mycelia by an aqueous two-phase system
Source: Royal Society of Chemistry journal article supplement (doi:10.1039/c7ra05360f), 2017-01-01
Supplement: c7ra05360f1.pdf [file c7ra05360f1.pdf]

**Supporting Information**

**A novel and environment-friendly bioprocess for separation  
and partial purification of the polysaccharides from  
*Cordyceps sinensis* mycelia by aqueous two-phase system**

Zhigang Li,<sup>a, b</sup> Ailin Chen,<sup>a</sup> Zhencheng Li,<sup>a</sup> Man Qu,<sup>a</sup> Huayong Chen,<sup>a, b</sup> Bo Yang<sup>a, b\*</sup>  
and Yonghua Wang<sup>c\*</sup>

a. School of Bioscience and Bioengineering, South China University of Technology,  
Guangzhou 510006, China,

b. Guangdong Provincial Key Laboratory of Fermentation and Enzyme Engineering,

c. School of Light Industry and Food Sciences, South China University of  
Technology, Guangzhou 510641, China,

\*Corresponding author: E-mail [yangbo@scut.edu.cn](mailto:yangbo@scut.edu.cn); [yonghw@scut.edu.cn](mailto:yonghw@scut.edu.cn)

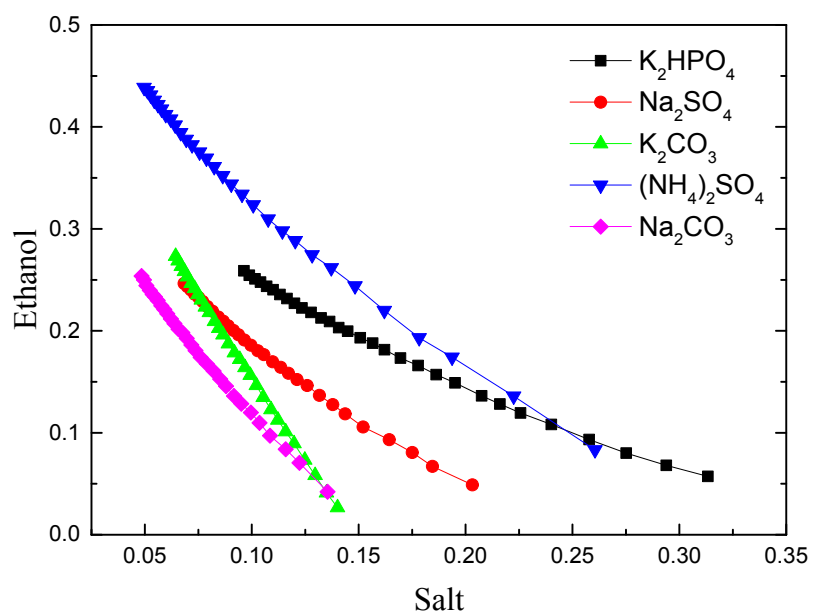

Figure S1 the phase diagrams of the ATPSs consist of ethanol and different salts.

The phase diagram of ATPS was obtained by using a turbidity titration method<sup>1</sup>

## References

1. Z. Li, Y. Sun, W. Zheng, H. Teng and Z. Xiu, *Biochemical Engineering Journal*, 2013, **80**, 68-75.
